# Supplementary material for: Attenuating Colorectal Cancer Using Nine Cultivars of Australian Lupin Seeds: Apoptosis Induction Triggered by Mitochondrial Reactive Oxygen Species Generation and Caspases-3/7 Activation
Source: MDPI journal article supplement (doi:10.3390/cells12212557), 2023-10-31
Supplement: s1 [file s1]

*Supplementary Materials*

# **Attenuating Colorectal Cancer Using Nine Cultivars of Australian Lupin Seeds: Apoptosis Induction Triggered by Mitochondrial Reactive Oxygen Species Generation and Caspases-3/7 Activation**

**Kishor Mazumder <sup>1,2,\*</sup>, Asma Aktar <sup>3</sup>, Sujatha Ramasamy <sup>4</sup>, Biswajit Biswas <sup>1,5</sup>, Philip G. Kerr <sup>6</sup> and Christopher Blanchard <sup>6</sup>**

<sup>1</sup> Department of Pharmacy, Jashore University of Science and Technology, Jashore 7408, Bangladesh

<sup>2</sup> School of Optometry and Vision Science, UNSW Medicine, University of New South Wales (UNSW), Sydney, NSW 2052, Australia

<sup>3</sup> Department of Pharmacy, Dhaka International University, Dhaka 1212, Bangladesh

<sup>4</sup> Institute of Biological Sciences, Faculty of Science, Universiti Malaya, Kuala Lumpur 50603, Malaysia

<sup>5</sup> Institute for Molecular Bioscience, Queensland University, Brisbane, QLD 4072, Australia

<sup>6</sup> School of Biomedical Sciences and Graham Centre for Agricultural Innovation, Charles Sturt University, Boorooma St., Wagga Wagga, NSW 2650, Australia

\* Correspondence: kmazumder@just.edu.bd or k.mazumder@unsw.edu.au

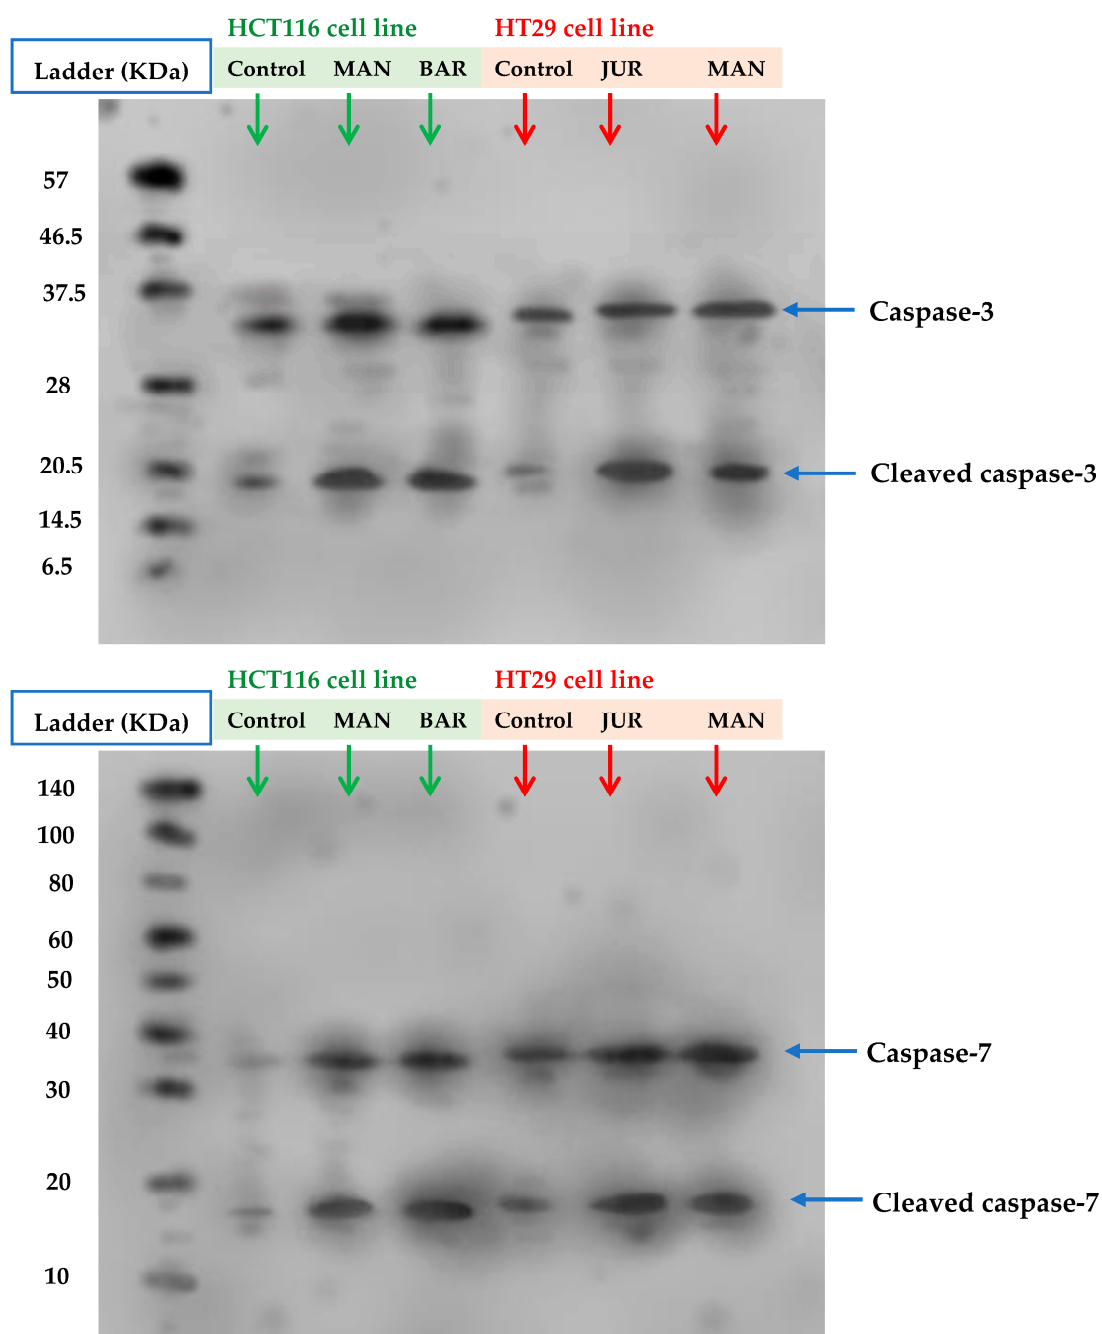

**Figure S1.** Full length images of Western blots in caspase-3/7 detection assay. MAN: Mandelup, BAR: Barlock, and JUR: Jurien.
